# Supplementary material
Source: PubMed Central journal article supplement (PMC3523557)

**Supplementary Figure S1** iTreg cell phenotype and cytokine profile. (A) iTreg were induced as described in the Methods section and the expression of Treg-related molecules was analyzed by flow cytometry. Data is representative of four independent experiments. (B-C) CD4<sub>con</sub> or iTreg generated as above were re-stimulated with anti-CD3/CD28 coated beads (1:5 ratio) and IL-2 (20 U/ml) for three days and supernatants were subjects to ELISA. Values are mean ± SEM of triplicate samples and data is representative of three separate experiments.

**SFig. 1**

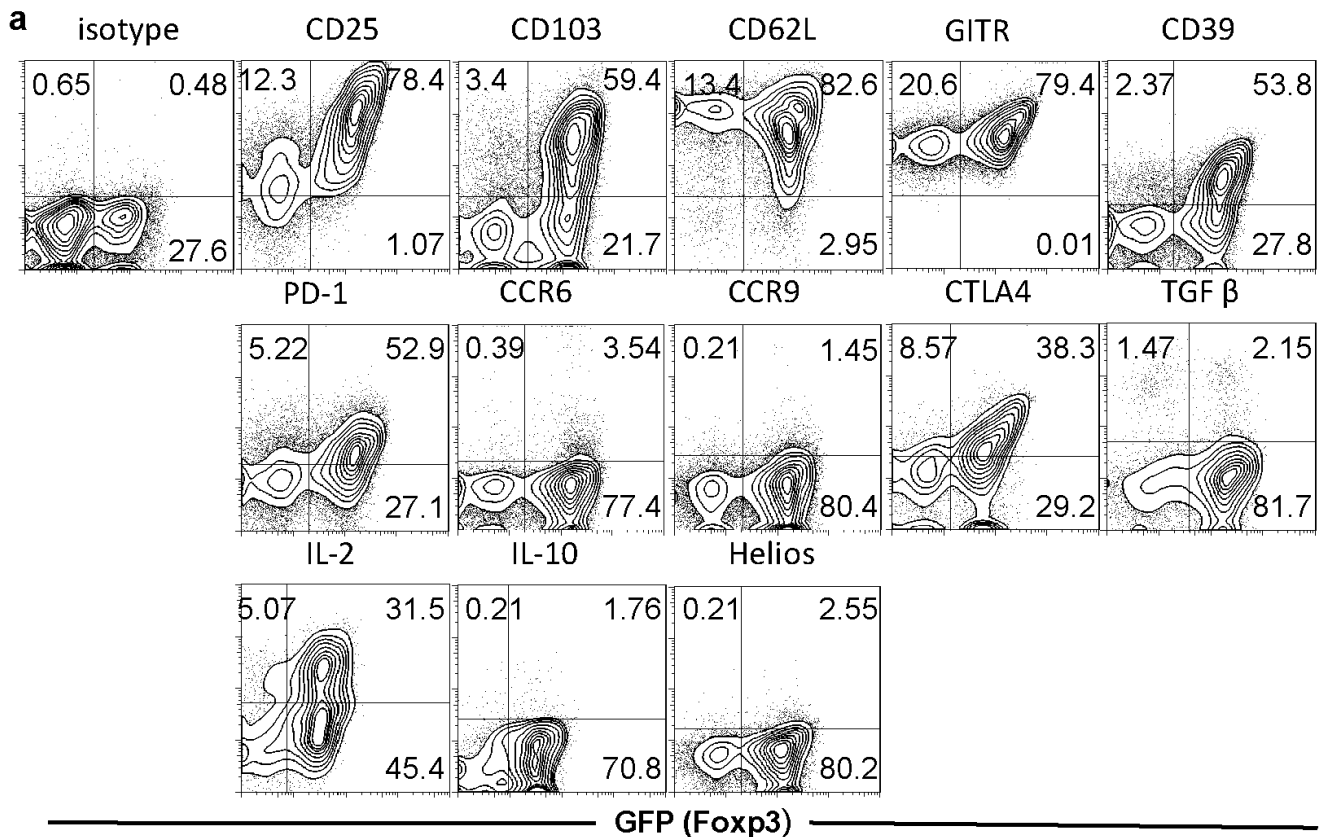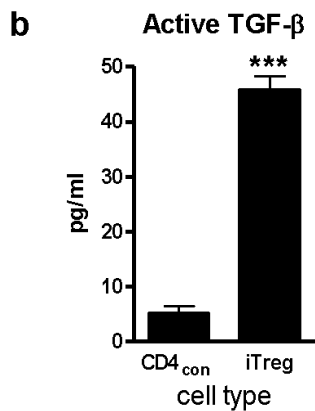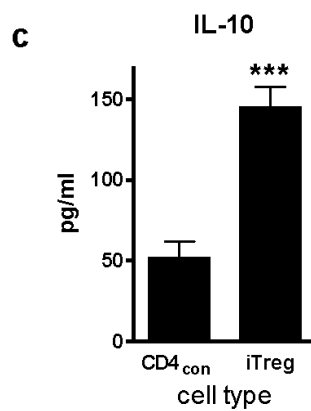

**Supplementary Figure S2** iTreg induced from D2 cells are not pathogenic and suppress cGVHD via TGF $\beta$ -dependent mechanism.  $12 \times 10^6$  fresh, CD4<sub>con</sub> or iTreg induced from D2 CD4<sup>+</sup> cells were transferred into D2B6F1 mice. (A) The levels of anti-dsDNA antibodies were evaluated weekly as indicated. (B) The proteinuria was assessed 12 weeks post-transfer (n=5 in each cohort). \*\* $p < 0.01$ , iTreg vs. CD4<sub>con</sub> or fresh CD4<sup>+</sup> cells. (C)  $12 \times 10^6$  fresh CD4<sup>+</sup> D2 cells were transferred alone or with  $5 \times 10^6$  iTreg into D2B6F1 mice. In some groups, anti-TGF $\beta$  antibody or control IgG were administered. IgG levels were examined by ELISA. Five mice in each cohort were included and data were combined from two independent experiments.  $P < 0.001$ , anti-TGF $\beta$  vs control IgG.

**Sfig. 2**

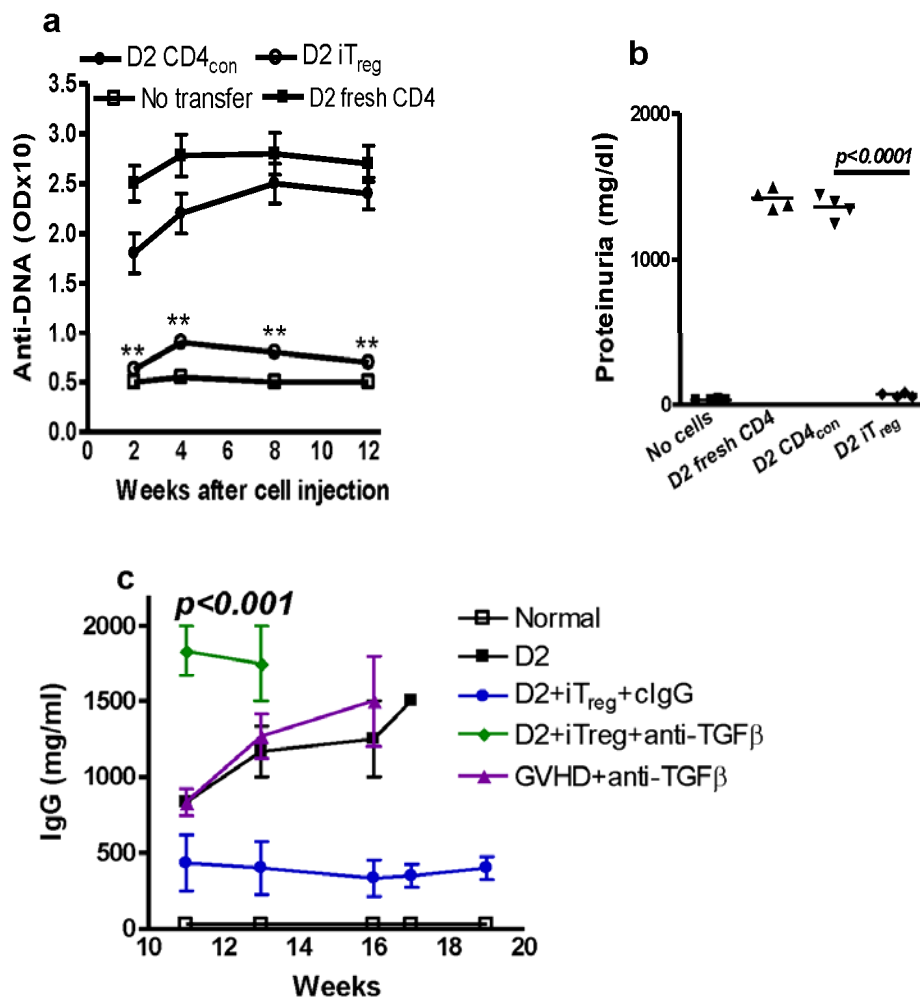

**Supplementary Figure S3** DCs primed with iTreg decrease antigen-presenting capacity via TGF $\beta$  but not IL-10 signaling pathway. Splenic CD11c<sup>+</sup> cells in C57BL/6 mice were co-cultured with CD4<sub>con</sub> or iTreg cells in the presence of ALK5i or DMSO, or anti-IL-10R or control IgG for three days as above. CD11c<sup>+</sup> cells were sorted and added CD25<sup>+</sup>-depleted T cells from D2 mice and T cell proliferation was measured by <sup>3</sup>H-[H]-incorporation. Values are mean  $\pm$  SEM of triplicate samples and data is representative of four separate experiments.

**SFig. 3**

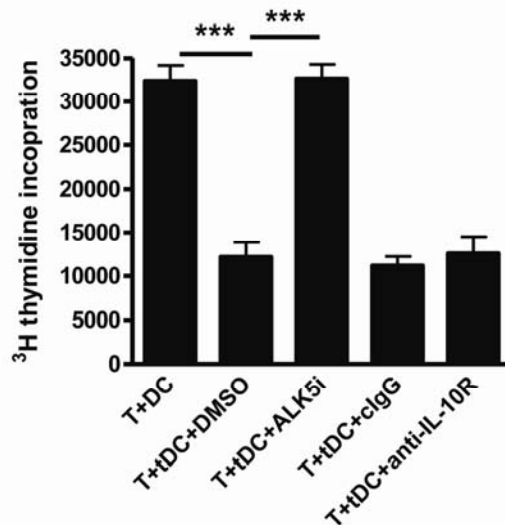

**Supplementary Figure S4** Comparable CD80 and CD86 expression on CD11c<sup>+</sup> DC cells between Cre<sup>-</sup> (wild type) and Cre<sup>+</sup> (DC-*Tgfr2* KO) littermates. CD80 and CD86 expression in splenic CD11c<sup>+</sup> cells from naïve Cre<sup>-</sup> and DC-*Tgfr2* KO mice. Data are representative of five mice in each strain.

**SFig. 4**

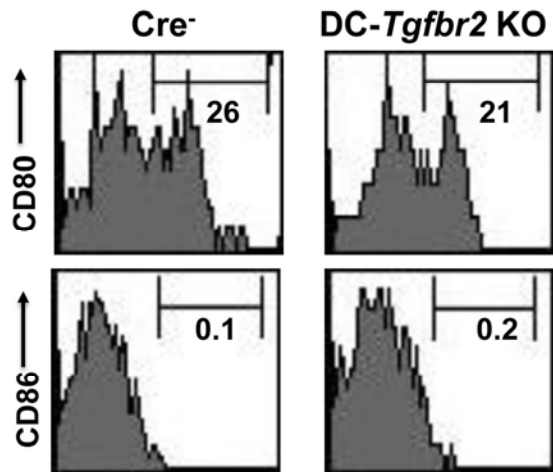

**Supplementary Figure S5** Tolerogenic DCs suppress donor engraftment in cGVHD mice.  $5 \times 10^5$   $CD11c^+$  cells were sorted from lupus mice treated with iTreg (tDCs) and were co-transferred with  $12 \times 10^6$  fresh D2  $CD4^+$  cells into D2B6F1 mice. ALK5i or DMSO (vehicle), anti-IL-10R or control IgG were administered in separate groups. The size of donor engraftment ( $H2^{kd+}$  and  $H2^{kb-}$ ) was analyzed by flow cytometry 3 weeks post-transfer. Data is representative of two independent experiments with total of 10 mice in each cohort.

**SFig. 5**

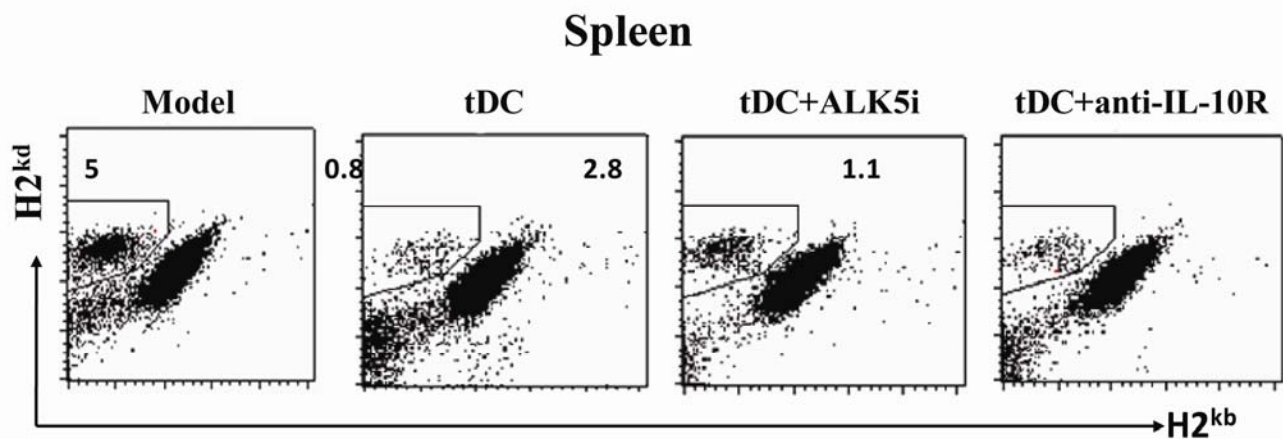

**Supplementary Figure S6** Tolerogenic DCs suppress renal IgG deposition in cGVHD mice.  $5 \times 10^5$  CD11c<sup>+</sup> cells were sorted from lupus mice treated with *iTreg* (tDCs) and were co-transferred with  $12 \times 10^6$  fresh D2 CD4<sup>+</sup> cells into D2B6F1 mice. ALK5i or DMSO (vehicle), anti-IL-10R or control IgG was administered in separate groups. The IgG deposition in kidney of cGVHD mice 20 weeks post-transfer was examined by fluorescence microscopy. Data is representative of two independent experiments with total of 10 mice in each cohort.

**SFig. 6**

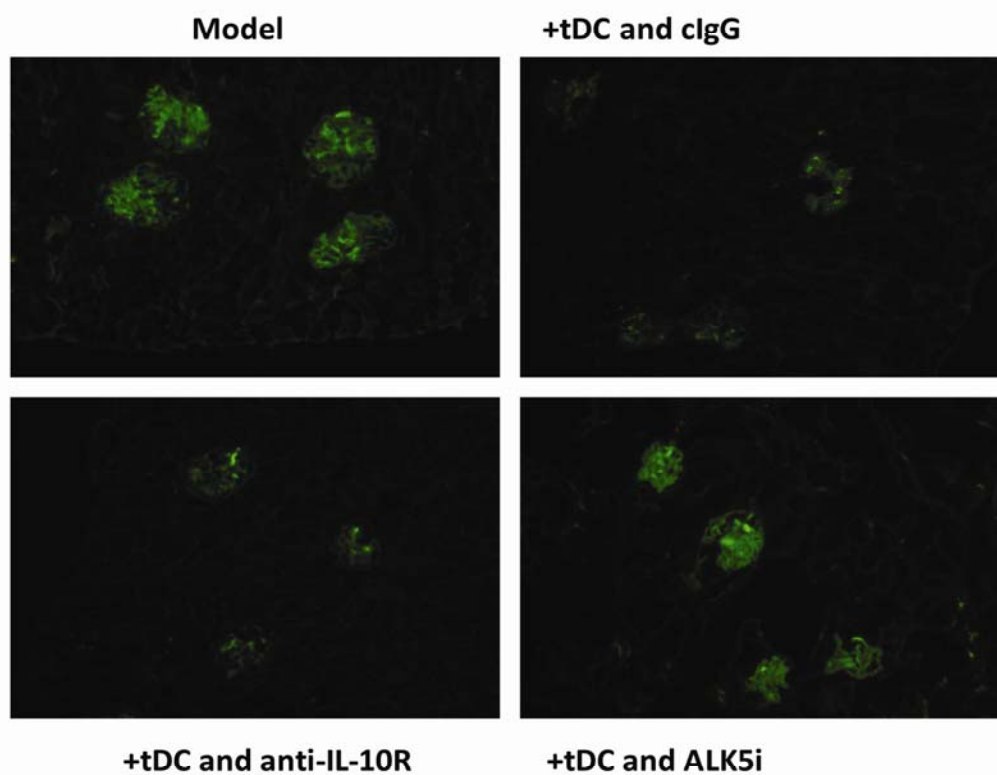

**Supplementary Figure S7** Tolerogenic DCs suppress lupus through TGF $\beta$ - but not IL-10-dependent mechanism. iTreg were co-cultured with DCs from Cre<sup>-</sup> or DC-*Tgfb2* KO mice for three days. These DCs (2x10<sup>5</sup>) were then co-transferred with naïve CD4<sup>+</sup>CD45RB<sup>high</sup> cells (5x10<sup>5</sup>) into Rag1<sup>-/-</sup> mice. Mice were sacrificed 4 weeks post-transfer. MLN cells were analyzed for TNF $\alpha$  and IFN $\gamma$  mRNA expression using real-time PCR. All experiments were repeated at least twice with similar results.

**SFig. 7**

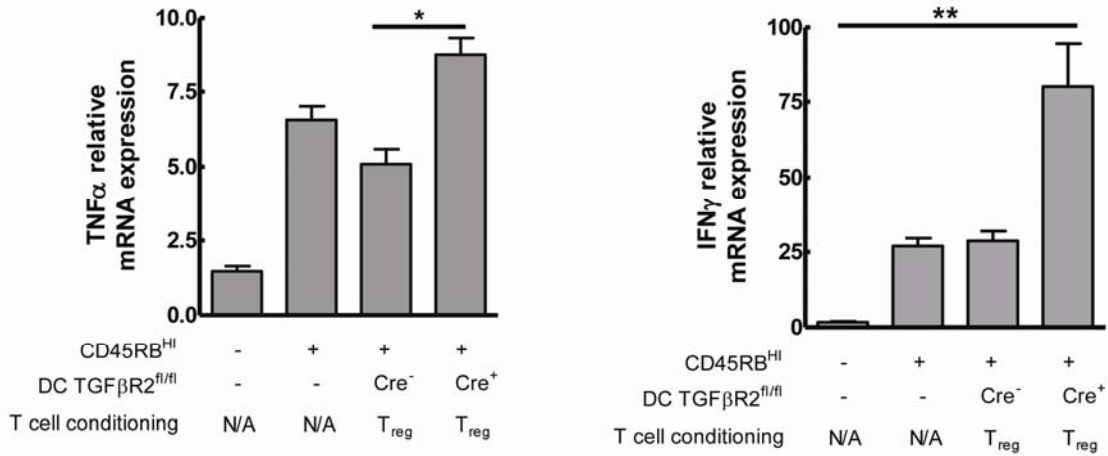

Supplement: supp_mjs040_mjs040supp.pdf [file supp_mjs040_mjs040supp.pdf]
